# Supplementary material for: Quantifying Rift Valley fever virus transmission efficiency in a lamb-mosquito-lamb model
Source: PubMed Central journal article supplement (PMC10759236; doi:10.3389/fcimb.2023.1206089), 2023-12-18
Supplement: DataSheet_1.pdf [file DataSheet_1.pdf]

## Supplemental files

|                                                                                        |   |
|----------------------------------------------------------------------------------------|---|
| Supplemental files.....                                                                | 1 |
| Supplemental Table 1: Estimate of $b$ under different mosquito infection criteria..... | 2 |
| Supplemental Table 2: Donor sheep Rift Valley fever virus titer.....                   | 3 |
| Supplemental Table 3: Pre-challenge mosquito infection check.....                      | 4 |
| Supplemental Table 4: Summary of infectious bites and outcome.....                     | 5 |
| Supplemental Figure 1.....                                                             | 6 |

## Supplemental Table 1: Estimate of $b$ under different mosquito infection criteria

Bold values are reported in the manuscript.

Hypotheses i and ii were assessed for different mosquito infection criteria. The number of infectious bites per individual in the low exposure group was set to 1, or the number of mosquitoes with PCR positive bodies was used. The number of infectious bites per individual in the high exposure group was a multiplication of 1) the number of mosquitoes a sheep was exposed to, or the number of mosquitoes that had taken a blood meal (engorged), and 2) the proportion of mosquitoes with RVFV particles in saliva or the proportion of mosquitoes with PCR positive bodies. The estimated proportion (mean), lower and upper confidence interval values were used to capture conservative and optimistic scenarios.

| Hypot hesis | $b$         | CI low      | CI high     | AIC          | Low_exposure               | High_Exposure_type | High_Exposure_proportion | High_Exposure_estimate |
|-------------|-------------|-------------|-------------|--------------|----------------------------|--------------------|--------------------------|------------------------|
| H2          | 0.29        | 0.14        | 0.54        | 15.82        | Set to 1                   | Exposed            | PCR_body                 | Mean                   |
| H2          | 0.29        | 0.14        | 0.54        | 15.86        | Set to 1                   | Exposed            | TCID50_saliva            | UpperCI                |
| H2          | 0.29        | 0.14        | 0.54        | 15.92        | Set to 1                   | Engorged           | PCR_body                 | Mean                   |
| H2          | 0.30        | 0.15        | 0.55        | 16.02        | Set to 1                   | Engorged           | TCID50_saliva            | UpperCI                |
| H2          | 0.32        | 0.16        | 0.56        | 16.33        | Set to 1                   | Exposed            | TCID50_saliva            | Mean                   |
| H2          | 0.18        | 0.08        | 0.33        | 16.35        | Set to 1                   | Exposed            | PCR_body                 | UpperCI                |
| H2          | 0.33        | 0.17        | 0.56        | 16.54        | Set to 1                   | Engorged           | TCID50_saliva            | Mean                   |
| H2          | 0.18        | 0.09        | 0.34        | 16.55        | Set to 1                   | Engorged           | PCR_body                 | UpperCI                |
| H2          | 0.33        | 0.17        | 0.56        | 16.58        | Set to 1                   | Exposed            | PCR_body                 | LowerCI                |
| H2          | 0.34        | 0.18        | 0.57        | 16.79        | Set to 1                   | Engorged           | PCR_body                 | LowerCI                |
| H2          | 0.36        | 0.20        | 0.59        | 17.39        | Set to 1                   | Exposed            | TCID50_saliva            | LowerCI                |
| H2          | 0.37        | 0.20        | 0.60        | 17.68        | Set to 1                   | Engorged           | TCID50_saliva            | LowerCI                |
| H2          | 0.22        | 0.10        | 0.43        | 17.75        | PCR positive bodies        | Exposed            | PCR_body                 | UpperCI                |
| H2          | 0.22        | 0.10        | 0.43        | 17.86        | PCR positive bodies        | Engorged           | PCR_body                 | UpperCI                |
| H2          | 0.24        | 0.12        | 0.44        | 18.25        | PCR positive bodies        | Exposed            | PCR_body                 | Mean                   |
| H2          | 0.24        | 0.12        | 0.44        | 18.32        | PCR positive bodies        | Exposed            | TCID50_saliva            | UpperCI                |
| H2          | 0.25        | 0.12        | 0.45        | 18.42        | PCR positive bodies        | Engorged           | PCR_body                 | Mean                   |
| H2          | 0.25        | 0.13        | 0.45        | 18.60        | PCR positive bodies        | Engorged           | TCID50_saliva            | UpperCI                |
| H2          | 0.27        | 0.14        | 0.47        | 19.10        | PCR positive bodies        | Exposed            | TCID50_saliva            | Mean                   |
| <b>H2</b>   | <b>0.28</b> | <b>0.15</b> | <b>0.47</b> | <b>19.42</b> | <b>PCR positive bodies</b> | <b>Engorged</b>    | <b>TCID50_saliva</b>     | <b>Mean</b>            |
| H2          | 0.28        | 0.15        | 0.48        | 19.48        | PCR positive bodies        | Exposed            | PCR_body                 | LowerCI                |
| H2          | 0.29        | 0.15        | 0.48        | 19.79        | PCR positive bodies        | Engorged           | PCR_body                 | LowerCI                |
| H2          | 0.31        | 0.17        | 0.50        | 20.66        | PCR positive bodies        | Exposed            | TCID50_saliva            | LowerCI                |
| H2          | 0.32        | 0.17        | 0.51        | 21.06        | PCR positive bodies        | Engorged           | TCID50_saliva            | LowerCI                |
| <b>H1</b>   | <b>0.57</b> | <b>0.36</b> | <b>0.77</b> | <b>30.68</b> |                            |                    |                          |                        |

H1:  $P(\text{inf})$  independent of  $n$  the number of infectious mosquito bites; H2:  $P(\text{inf})$  dependent on  $n$ ;  $b$  RVFV transmission efficiency from vector to host; CI: confidence interval

**Supplemental Table 2: Donor sheep Rift Valley fever virus titer**

| <b>Individual</b> | <b>Log<sub>10</sub> copies / ml</b> | <b>Log<sub>10</sub> TCID<sub>50</sub>/ml</b> | <b>Mosquitoes fed</b> |
|-------------------|-------------------------------------|----------------------------------------------|-----------------------|
| 271               | 8.07                                | 4.35                                         | 288                   |
| 272               | 9.13                                | 5.98                                         | 102                   |
| 273               | 8.70                                | 7.15                                         | 162                   |
| 274               | 9.77                                | 6.45                                         | 41                    |
| 275               | 3.63                                | 1.55                                         | 48                    |

### Supplemental Table 3: Pre-challenge mosquito infection check

To estimate RVFV infection (positive bodies) and dissemination (positive saliva) rates, 30 mosquitoes were randomly selected for RT-qPCR testing on day 7 post feeding (experimental day -5).

| <b>Mosquito</b> | <b>Body</b> | <b>Saliva</b> |
|-----------------|-------------|---------------|
| 1               | Neg         | Neg           |
| 2               | Neg         | Neg           |
| 3               | Neg         | Neg           |
| 4               | Neg         | Neg           |
| 5               | 2.50E+05    | Neg           |
| 6               | 1.37E+05    | Neg           |
| 7               | Neg         | Neg           |
| 8               | Neg         | Neg           |
| 9               | Neg         | Neg           |
| 10              | Neg         | Neg           |
| 11              | 4.90E+04    | Neg           |
| 12              | Neg         | Neg           |
| 13              | Neg         | Neg           |
| 14              | 7.52E+04    | Neg           |
| 15              | Neg         | Neg           |
| 16              | Neg         | Neg           |
| 17              | Neg         | Neg           |
| 18              | Neg         | Neg           |
| 19              | Neg         | Neg           |
| 20              | Neg         | Neg           |
| 21              | 1.91E+05    | Neg           |
| 22              | Neg         | Neg           |
| 23              | Neg         | Neg           |
| 24              | 2.50E+05    | Neg           |
| 25              | 4.89E+04    | Neg           |
| 26              | Neg         | Neg           |
| 27              | 7.20E+05    | Neg           |
| 28              | Neg         | Neg           |
| 29              | Neg         | Neg           |
| 30              | 1.29E+02    | Neg           |
| <b>Total</b>    | <b>9/30</b> | <b>0/30</b>   |

### Supplemental Table 4: Summary of infectious bites and outcome

The number of animals that became viremic after a certain number of infectious bites, and the total number of animals per exposure.

| Group                               | Low exposure |       |       | High exposure |       |       |
|-------------------------------------|--------------|-------|-------|---------------|-------|-------|
|                                     | 1            | 2     | 3     | 7             | 8     | 9     |
| Number of infectious bites          |              |       |       |               |       |       |
| Number of viremic / exposed animals | 3 / 9        | 0 / 2 | 0 / 1 | 1 / 1         | 4 / 4 | 4 / 4 |

## Supplemental Figure 1

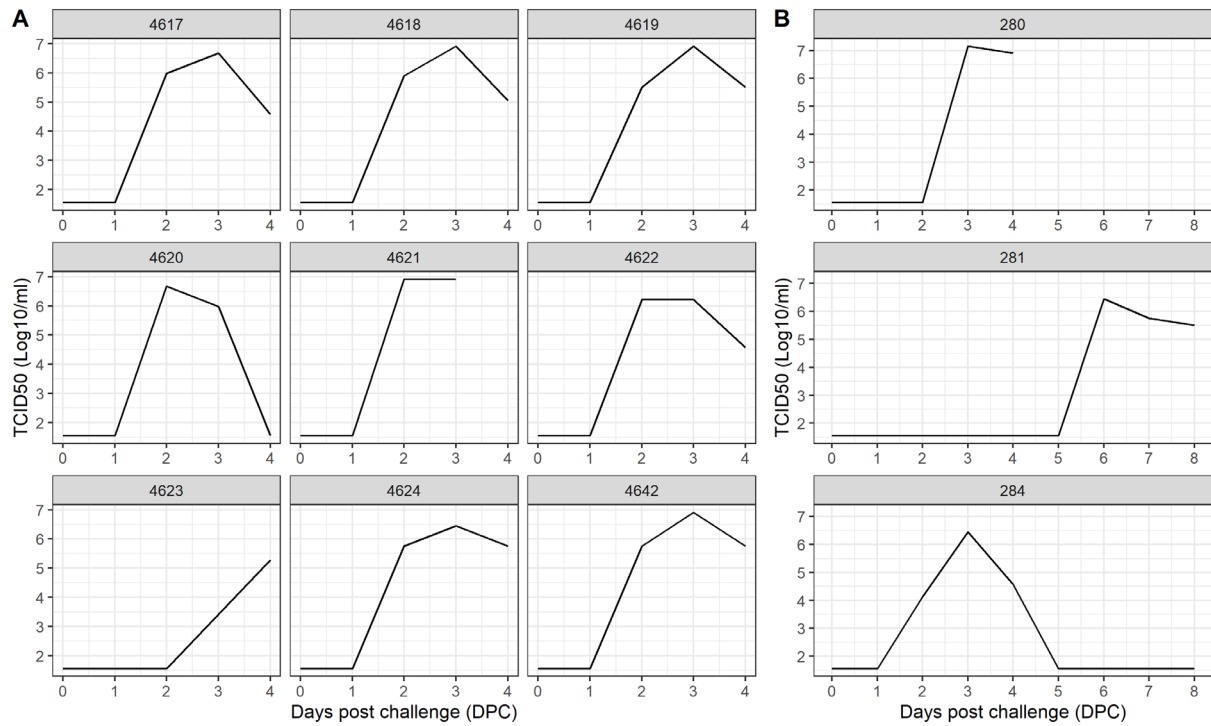

Rift Valley fever virus viremia trajectory of individual sheep in the high exposure (A) and low exposure (B) groups.

Blood samples were taken daily. Animal 4621 and 280 succumbed to infection.
